# Supplementary material
Source: Royal Society of Chemistry journal article supplement (doi:10.1039/d6cp00141f)
Supplement: d6cp00141f1.pdf [file d6cp00141f1.pdf]

## **High Selectively C<sub>2</sub>H<sub>4</sub>/C<sub>2</sub>H<sub>2</sub> Separation by cyano-functionalized alkadiyne-pyrene conjugated frameworks membrane**

Jie Liu,<sup>a‡</sup> Junjie Chen,<sup>a‡</sup> Guosheng Shi,<sup>a</sup> Junjie Hao,<sup>a</sup> Caiyuan Wu,<sup>a</sup> Yuqing Liu,<sup>a</sup> Xu Zhao<sup>a</sup> and Xing Liu<sup>a\*</sup>

<sup>a</sup>Shanghai Key Laboratory of Atomic Control and Application of Inorganic 2D Supermaterials, Shanghai Applied Radiation Institute, Shanghai University, Shanghai 200444, China.

\*Corresponding authors: liuxing0215@shu.edu.cn (X.L.)

‡These authors contributed equally to this work.

**PS1: The OPLS-AA force-field parameters for PTEP, CN-PTEP, gas molecules, and graphene.**

**PS2: Definition of C-H...N hydrogen bonding and analysis of the most stable adsorption configurations of C<sub>2</sub>H<sub>4</sub> and C<sub>2</sub>H<sub>2</sub> on CN-PTEP.**

**PS3: Other adsorption configurations and adsorption energies of gas molecules on the CN-PTEP and PTEP membranes.**

**PS4: Transition-state interaction analysis for C<sub>2</sub>H<sub>4</sub> and C<sub>2</sub>H<sub>2</sub> permeation through the CN-PTEP pore.**

**PS5: The estimation of pre-exponential factors for C<sub>2</sub>H<sub>4</sub> and C<sub>2</sub>H<sub>2</sub> based on transition-state theory.**

**PS6: Effect of ESP-derived pore-edge charges on the MD permeation results.**

**PS7: MD simulation model and the permeation behavior of the pristine PTEP membrane.**

## PS1: The OPLS-AA force-field parameters for PTEP, CN-PTEP, gas molecules, and graphene.

The PTEP and CN-PTEP membranes were described within the OPLS-AA framework, in which membrane atoms were assigned Lennard-Jones (LJ) parameters and partial charges according to their local chemical environments. As shown in Fig. S1a-b and Table S1, the pristine PTEP membrane contains one labeled hydrogen site (H) and three labeled carbon sites (C1, C2, and C3). Specifically, H denotes the hydrogen atom attached to the benzene ring, C1 refers to the carbon atom in the benzene ring bonded to H, C2 denotes a carbon atom in the benzene ring, and C3 denotes a carbon atom in the alkynyl chain. For the CN-functionalized membrane, N1 denotes the nitrogen atom in the -CN group, C1 denotes the carbon atom in the -CN group, C2 denotes the carbon atom in the benzene ring directly bonded to the -CN group, C3 denotes a carbon atom in the benzene ring, and C4 denotes a carbon atom in the alkynyl chain. The gas molecules  $C_2H_2$  and  $C_2H_4$  were also described using the OPLS-AA force field, and the corresponding parameters are summarized in Table S1.

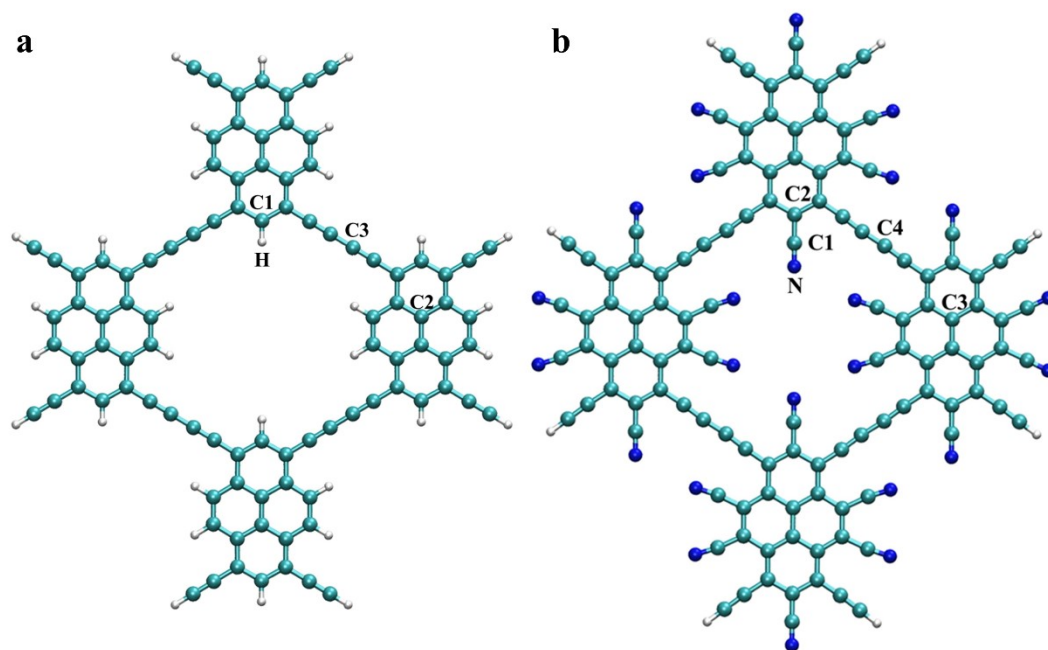

**Fig. S1** Atom-type assignment for the PTEP and CN-PTEP membranes. Atoms are colored as follows: C, cyan; H, white; N, blue.

**Table R1.** The OPLS-AA force-field parameters used for PTEP, CN-PTEP, C<sub>2</sub>H<sub>2</sub>, and C<sub>2</sub>H<sub>4</sub> in the MD simulations.

| Molecule                          | Atom type | $\epsilon$ (kJ/mol) | $\sigma$ (Å) | q(e)   | Ref |
|-----------------------------------|-----------|---------------------|--------------|--------|-----|
| <b>PTEP</b>                       | C1        | 0.293               | 3.550        | -0.115 | 1   |
|                                   | C2        | 0.293               | 3.550        | 0.000  | 1   |
|                                   | C3        | 0.360               | 3.400        | 0.000  | 2   |
|                                   | H         | 0.126               | 2.420        | 0.115  | 1   |
| <b>CN-PTEP</b>                    | C1        | 0.628               | 3.650        | 0.395  | 3   |
|                                   | C2        | 0.293               | 3.550        | 0.035  | 3   |
|                                   | C3        | 0.293               | 3.550        | 0.000  | 1   |
|                                   | C4        | 0.360               | 3.400        | 0.000  | 2   |
| <b>C<sub>2</sub>H<sub>2</sub></b> | N         | 0.711               | 3.200        | -0.430 | 3   |
|                                   | C         | 0.360               | 3.300        | -0.294 | 4   |
|                                   | H         | 0.063               | 2.420        | 0.294  | 4   |
| <b>C<sub>2</sub>H<sub>4</sub></b> | C         | 0.318               | 3.550        | -0.330 | 4   |
|                                   | H         | 0.126               | 2.420        | 0.165  | 4   |
| <b>graphene</b>                   | C         | 0.293               | 3.400        | 0.000  | 5   |

## PS2: Definition of C-H $\cdots$ N hydrogen bonding and analysis of the most stable adsorption configurations of C<sub>2</sub>H<sub>4</sub> and C<sub>2</sub>H<sub>2</sub> on CN-PTEP.

According to previous studies<sup>6, 7</sup> and the IUPAC<sup>8</sup> recommendation, a C-H $\cdots$ N interaction can be considered to form hydrogen bond when the H $\cdots$ N distance is within the sum of the van der Waals radii of H and N and the C-H $\cdots$ N angle is larger than 110°. For the present system, we therefore considered the H $\cdots$ N distances and the  $\angle$ C-H $\cdots$ N angles between C<sub>2</sub>H<sub>4</sub>/C<sub>2</sub>H<sub>2</sub> and the cyano functional groups inside the pore. Using the commonly adopted van der Waals radii of 1.20 Å for H and 1.55 Å for N, the corresponding H $\cdots$ N distance is 2.75 Å.

As shown in Fig. S2, for the most stable adsorption configuration of C<sub>2</sub>H<sub>4</sub> adsorption on the CN-PTEP membrane, the H1 $\cdots$ N1 distance was 2.46 Å and the angle  $\angle$ C1-H1 $\cdots$ N1 was 162.4°, the H2 $\cdots$ N2 distance was 2.41 Å and the angle  $\angle$ C1-H2 $\cdots$ N2 angle was 174.6°, which indicate two C-H $\cdots$ N hydrogen bonds formed between C<sub>2</sub>H<sub>4</sub> and CN-PTEP. In contrast, for the most stable adsorption configuration of C<sub>2</sub>H<sub>2</sub> adsorption on the CN-PTEP membrane, the H1 $\cdots$ N1 and H1 $\cdots$ N2 distances increase to 3.57 and 3.47 Å, respectively, while the corresponding  $\angle$ C1-H1 $\cdots$ N1 and  $\angle$ C1-H1 $\cdots$ N2 angles decrease to 111.8° and 113.8°, which indicates C<sub>2</sub>H<sub>2</sub> cannot form C-H $\cdots$ N hydrogen bond with CN-PTEP membrane.

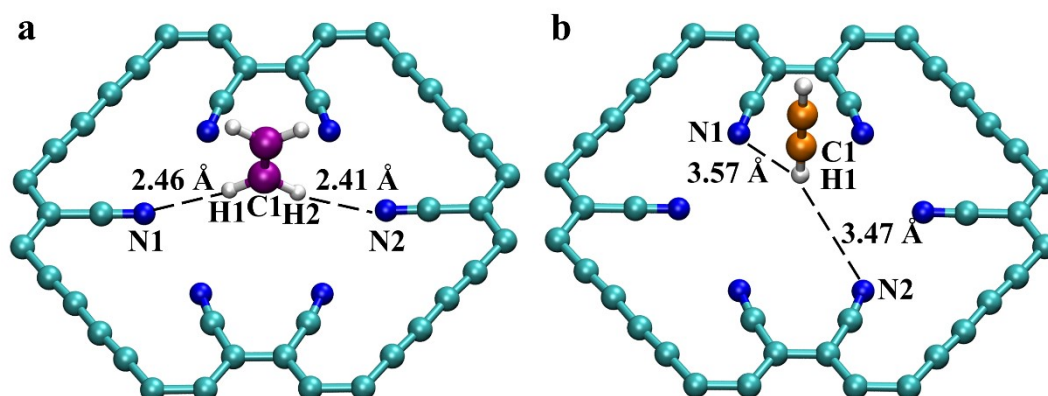

**Fig. S2** Optimized configurations of C<sub>2</sub>H<sub>4</sub> and C<sub>2</sub>H<sub>2</sub> adsorption on the CN-PTEP membrane. Atoms are colored as follows: C, cyan; H, white; N, blue. For clarity, the carbon atoms of C<sub>2</sub>H<sub>4</sub> are colored purple, and the carbon atoms of C<sub>2</sub>H<sub>2</sub> are colored orange.

### PS3: Other adsorption configurations and adsorption energies of gas molecules on the CN-PTEP and PTEP membranes.

Fig. S3 shows the different adsorption configurations of ethylene ( $C_2H_4$ ) and acetylene ( $C_2H_2$ ) molecules on the CN-PTEP membrane, where  $d$  represents the perpendicular distance of the gas molecules from the membrane surface.

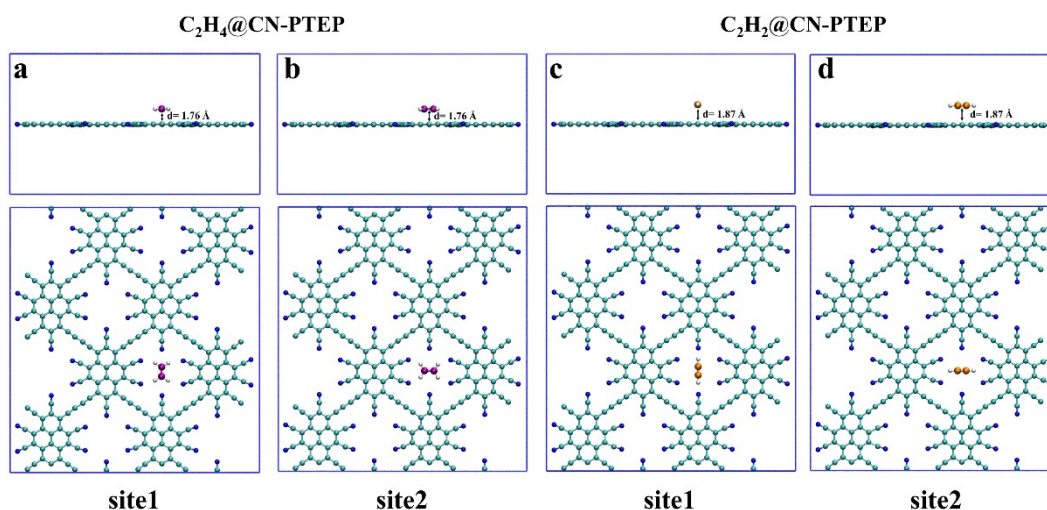

**Fig. S3** Adsorption configuration of  $C_2H_4$  and  $C_2H_2$  on CN-PTEP membrane. The different adsorption configurations of  $C_2H_4$  molecules (a-b) and  $C_2H_2$  molecules (c-d) on CN-PTEP membranes, as well as their vertical heights relative to the membrane surface. Atoms are colored as follows: C, cyan; H, white; N, blue. For clarity, the carbon atom of  $C_2H_4$  is colored purple, and the carbon atom of  $C_2H_2$  is colored orange.

As shown in Fig. S4, the most stable adsorption configuration of  $C_2H_4$  was oriented horizontally at the center of the membrane pore (Fig. S4a), while  $C_2H_2$  was adsorbed vertically at the pore center and aligned perpendicular to the PTEP membrane plane (Fig. S4i).

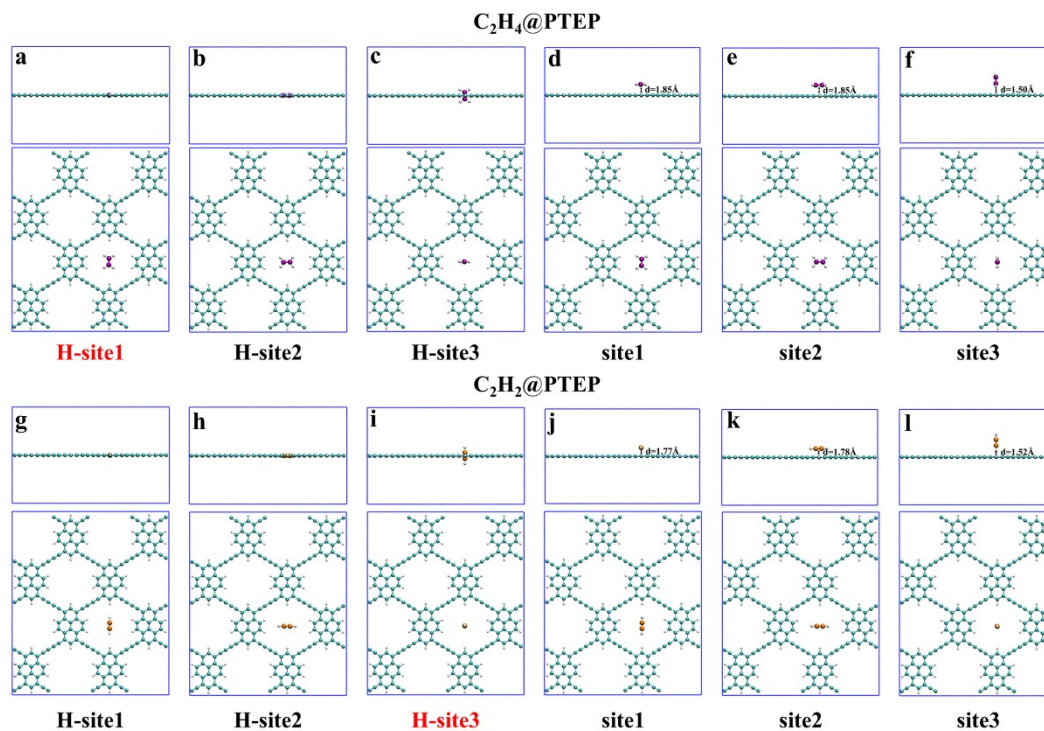

**Fig. S4** Adsorption configuration of  $C_2H_4$  and  $C_2H_2$  on PTEP membrane. The different adsorption configurations of acetylene molecules (a-f) and ethylene molecules (g-l) on PTEP membranes, as well as their vertical heights relative to the membrane surface. Atoms are colored as follows: C, cyan; H, white; N, blue. For clarity, the carbon atom of  $C_2H_4$  is colored purple, the carbon atom of  $C_2H_2$  is colored orange.

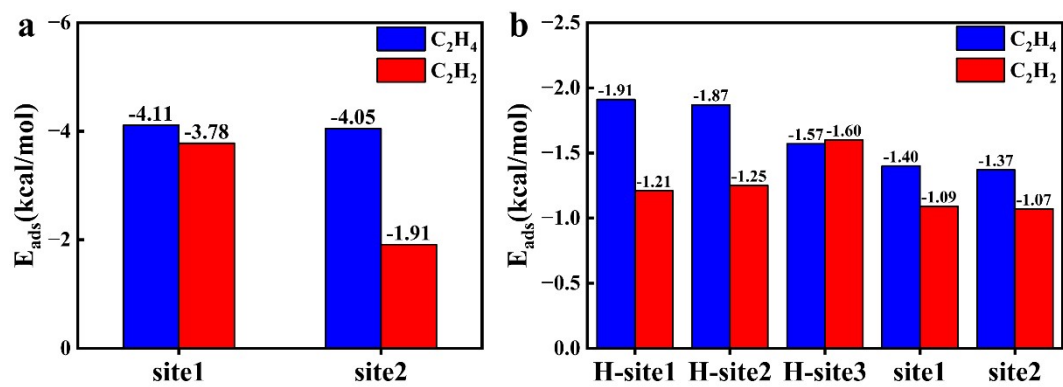

**Fig. S5** Adsorption energies of C<sub>2</sub>H<sub>4</sub> and C<sub>2</sub>H<sub>2</sub> on CN-PTEP and PTEP membranes with different adsorption configurations. (a) Adsorption energies on the CN-PTEP membrane;(b) Adsorption energies on the pristine PTEP membrane.

#### **PS4: Transition-state interaction analysis for C<sub>2</sub>H<sub>4</sub> and C<sub>2</sub>H<sub>2</sub> permeation through the CN-PTEP pore.**

We further analyzed the transition-state geometries and pore-molecule interactions in detail. The pore-molecule interaction at the transition state was defined as follows:

$$E_{\text{int}} = E_{\text{TS}} - E_{\text{CN-PTEP}} - E_{\text{gas}}$$

where  $E_{\text{TS}}$  is the total energy of the transition-state configuration,  $E_{\text{CN-PTEP}}$  is the energy of the CN-PTEP membrane, and  $E_{\text{gas}}$  is the energy of the gas molecules.

The interaction energy between C<sub>2</sub>H<sub>4</sub> and CN-PTEP at the TS is -4.09 kcal/mol, this attraction interaction mainly results from the C-H $\cdots$ N hydrogen bond formed between C<sub>2</sub>H<sub>4</sub> and CN-PTEP, thus the energy barrier of C<sub>2</sub>H<sub>4</sub> is very small. Whereas the interaction of C<sub>2</sub>H<sub>2</sub> is 2.63 kcal/mol, which shows that C<sub>2</sub>H<sub>2</sub> was repelled when passing through the pore, thus the relatively high energy barrier needs to be overcome.

As shown in Fig. R5, the H1 $\cdots$ N1 distance was 2.44 Å and the angle  $\angle$ C1-H1 $\cdots$ N1 was 134.3°, and the H2 $\cdots$ N2 distance was 2.44 Å and the angle  $\angle$ C1-H2 $\cdots$ N2 angle was 137.4°, which indicates two C-H $\cdots$ N hydrogen bonds formed between C<sub>2</sub>H<sub>4</sub> and CN-PTEP. In contrast, for C<sub>2</sub>H<sub>2</sub>, the H1 $\cdots$ N1 and H1 $\cdots$ N2 distances increase to 3.63 and 3.72 Å, respectively, while the corresponding  $\angle$ C1-H1 $\cdots$ N1 and  $\angle$ C1-H1 $\cdots$ N2 angles decrease to 64.7° and 63.6°, which indicates C<sub>2</sub>H<sub>2</sub> cannot form C-H $\cdots$ N hydrogen bond with the CN-PTEP membrane. C<sub>2</sub>H<sub>4</sub> formed two C-H $\cdots$ N hydrogen bonds with the CN-PTEP membrane, which results in the favorable orientation of C<sub>2</sub>H<sub>4</sub> to pass through the nanopore of CN-PTEP. However, C<sub>2</sub>H<sub>2</sub> without C-H $\cdots$ N hydrogen bond passes vertically through the nanopore of the CN-PTEP. These results showed that the selective permeation of C<sub>2</sub>H<sub>4</sub> arises from the C-H $\cdots$ N hydrogen-bonding interaction and the resulting favorable orientational.

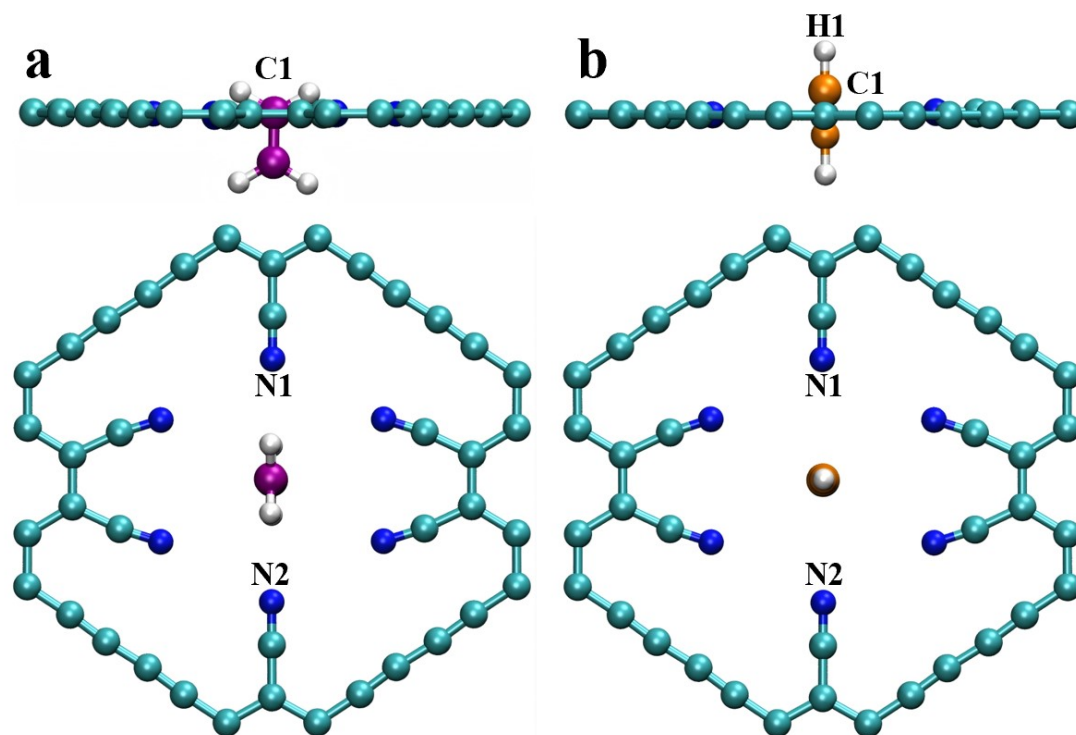

**Fig. S6** Transition-state configurations of  $C_2H_4$  and  $C_2H_2$  permeation through the CN-PTEP pore. Atoms are colored as follows: C, cyan; H, white; N, blue. For clarity, the carbon atoms of  $C_2H_4$  are colored purple, and the carbon atoms of  $C_2H_2$  are colored orange.

**PS5: The estimation of pre-exponential factors for C<sub>2</sub>H<sub>4</sub> and C<sub>2</sub>H<sub>2</sub> based on transition-state theory.**

We have performed vibrational frequency analyses for both the initial states (IS) and transition states (TS) of C<sub>2</sub>H<sub>4</sub> and C<sub>2</sub>H<sub>2</sub> permeation, and estimated the pre-exponential factors based on the transition-state theory (TST). According to the previous research<sup>9</sup>, the pre-exponential factor was calculated as follows:

$$A_{\text{act}} = \frac{k_{\text{B}}T}{h} \exp\left(\frac{\Delta S^{\ddagger}}{k_{\text{B}}}\right) \quad (4)$$

where  $k_{\text{B}}$  is the Boltzmann constant,  $T$  is the temperature,  $h$  is the Planck constant,  $\Delta S^{\ddagger}$  is the activation entropy defined as  $S_{\text{TS}} - S_{\text{IS}}$ .

**Table S2** The pre-exponential factors based on TST, diffusion barriers, and corrected ideal selectivity for C<sub>2</sub>H<sub>4</sub>/C<sub>2</sub>H<sub>2</sub> permeation through the CN-PTEP membrane at 298 K.

| gas                           | A (s <sup>-1</sup> )  | E <sub>b</sub> (kcal/mol) | selectivity       |
|-------------------------------|-----------------------|---------------------------|-------------------|
| C <sub>2</sub> H <sub>4</sub> | 4.15×10 <sup>12</sup> | 0.87                      | 1×10 <sup>4</sup> |
| C <sub>2</sub> H <sub>2</sub> | 1.05×10 <sup>13</sup> | 6.87                      |                   |

## PS6: Effect of ESP-derived pore-edge charges on the MD permeation results.

To assess the possible influence of the pore-edge electrostatic environment on the MD results, we further examined the effect of ESP-derived charges for representative pore-edge atoms in the CN-PTEP membrane. The original MD simulations were carried out using the charge parameters provided by the OPLS-AA force field. To refine the electrostatic description around the pore edge, a representative cluster model of the CN-PTEP pore region was constructed, as shown in Fig. S7a. Based on this cluster model, DFT calculations were performed using Gaussian<sup>10</sup> at the B3LYP/6-31G(d) level<sup>11</sup>, and the electrostatic potential (ESP) charges of the key pore-edge atoms were subsequently obtained using the Multiwfn program<sup>12</sup>.

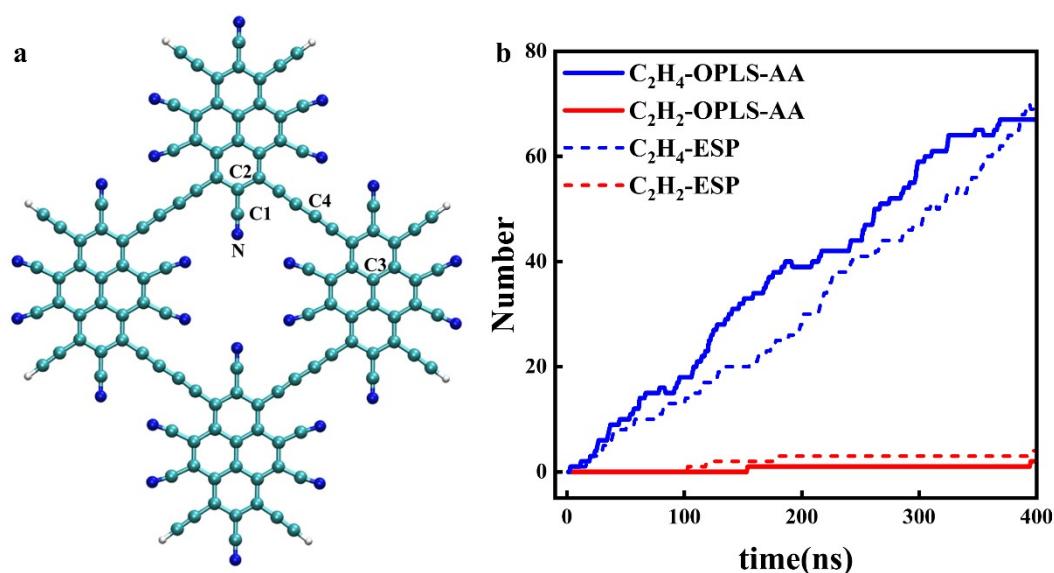

**Fig. S7** ESP charge derivation and MD validation for the CN-PTEP pore. (a) Representative cluster model of the CN-PTEP pore used for DFT-based ESP charge analysis. N1 denotes the nitrogen atom in the -CN group, C1 denotes the carbon atom in the -CN group, C2 denotes the carbon atom in the benzene ring bonded to the -CN group, C3 denotes a carbon atom in the benzene ring, and C4 denotes a carbon atom in the alkyne chain. (b) Time evolution of permeated molecule numbers at 298 K obtained using the original OPLS-AA charges (solid lines) and the ESP-derived charges (dashed lines). Atoms are colored as follows: C, cyan; H, white; N, blue.

The resulting ESP-derived charges were compared with the original charge

parameters used in the MD simulations, and the detailed comparison is summarized in Table S3. For the representative pore-edge atoms, the original/ESP-derived charges are 0.395/0.382 for C1, 0.035/0.023 for C2, 0/0 for C3, 0/0 for C4, and -0.430/-0.405 for N, respectively. Although the absolute magnitudes are slightly reduced in the ESP-derived values, the charge signs and the relative electrostatic distribution around the pore are consistent.

To further evaluate whether this charge difference would affect the MD results, we further performed a validation simulation at 298 K by using the ESP-derived charges. As shown in Fig. S7b, compared with the original charge set, the number of permeated  $C_2H_4$  molecules changed only slightly from 67 to 70, while that of  $C_2H_2$  changed from 2 to 4 after the same 400 ns simulation time. Thus, the use of ESP-derived charges leads to minor quantitative variations and does not alter the qualitative permeation trend. In particular, CN-PTEP still exhibits a pronounced preferential permeation for  $C_2H_4$  over  $C_2H_2$ .

**Table S3** Original and ESP-derived charges of the key pore-edge atoms in CN-PTEP

| Atom               | C1    | C2    | C3    | C4    | N      |
|--------------------|-------|-------|-------|-------|--------|
| OPLS-AA charge     | 0.395 | 0.035 | 0.000 | 0.000 | -0.430 |
| ESP-derived charge | 0.382 | 0.023 | 0.000 | 0.000 | -0.405 |

**PS7: MD simulation model and the permeation behavior of the pristine PTEP membrane.**

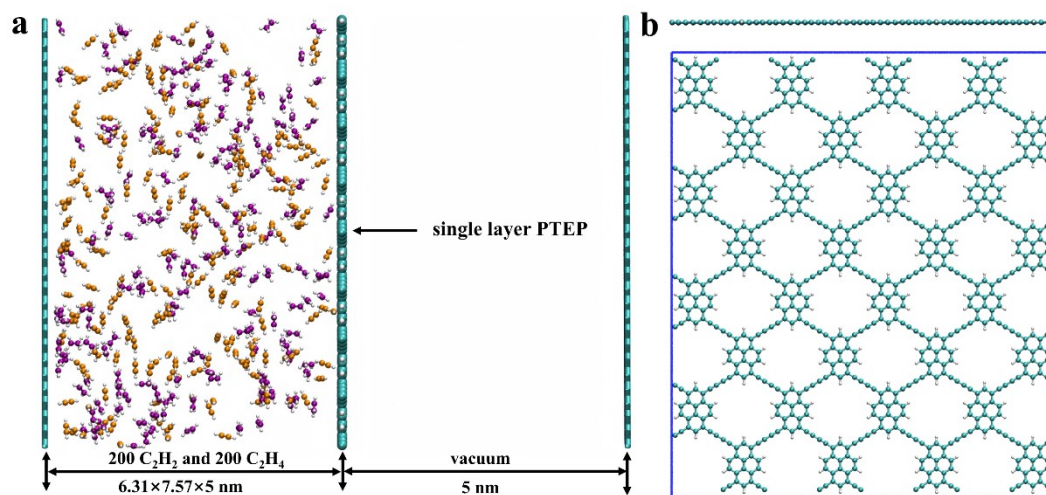

**Fig. S8** MD simulation model and PTEP membrane structure for C<sub>2</sub>H<sub>4</sub>/C<sub>2</sub>H<sub>2</sub> separation.

(a) Simulation model of the C<sub>2</sub>H<sub>4</sub>/C<sub>2</sub>H<sub>2</sub> mixture separation through the PTEP membrane. (b) Side and top views of the single-layer PTEP used in the simulations. Atoms are colored as follows: C, cyan; H, white. For clarity, the carbon atoms of C<sub>2</sub>H<sub>4</sub> are colored purple, the carbon atoms of C<sub>2</sub>H<sub>2</sub> are colored orange.

Fig. S9a showed the variation of the number of  $C_2H_4$  and  $C_2H_2$  passing through the PTEP membrane over time. Fig. S9b was a snapshot of the separation system at 500 ps. At this time,  $\sim 101$   $C_2H_2$  and  $\sim 99$   $C_2H_4$  pass through the PTEP membrane.

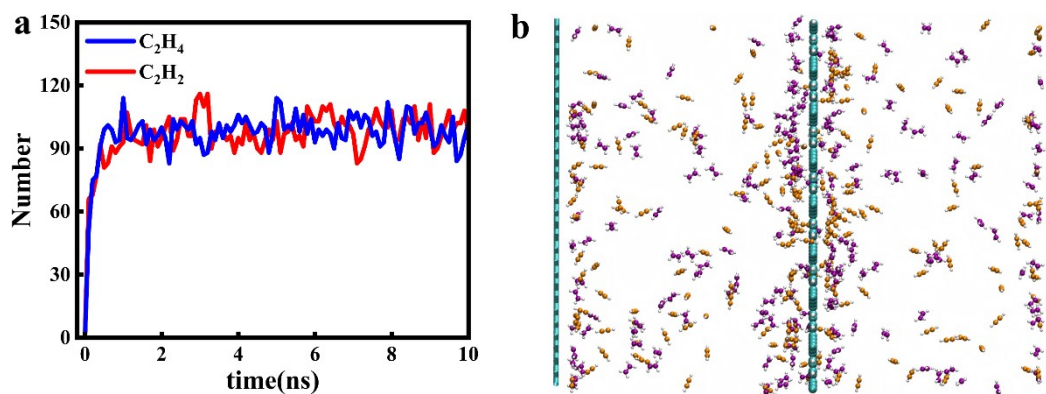

**Fig. S9** Separation performance of the CN-PTEP membrane for  $C_2H_4/C_2H_2$ . (a) The number of gas molecules passing through the PTEP membrane changed with simulation time. (b) Snapshots of the  $C_2H_4/C_2H_2$  gas mixtures permeating through the PTEP membrane after 500 ps. Atoms are colored as follows: C, cyan; H, white. For clarity, the carbon atoms of  $C_2H_4$  are colored purple, the carbon atoms of  $C_2H_2$  are colored orange.

## References

- 1 F. Müller-Plathe, *Macromolecules*. 1996, 29, 4782-4791.
- 2 X. Zheng, S. Ban, B. Liu, G. Chen, *Chin. J. Chem. Eng.* 2020, 28, 1898-1903.
- 3 M.L. Price, D. Ostrovsky, W.L. Jorgensen, *J. Comput. Chem.* 2001, 22, 1340-1352.
- 4 H. Xing, X. Zhao, Q. Yang, B. Su, Z. Bao, Y. Yang, Q. Ren, *Ind. Eng. Chem. Res.* 2013, 52, 9308-9316.
- 5 N. Karimzadeh, J. Azamat, H. Erfan-Niya, *J. Mol. Graph. Model.* 2022, 110, 108059.
- 6 R. Taylor, O. Kennard, *J. Am. Chem. Soc.* 1982, 104, 5063-5070.
- 7 S.J. Grabowski, *Chem. Commun.* 2024, 60, 6239-6255.
- 8 E. Arunan, G.R. Desiraju, R.A. Klein, J. Sadlej, S. Scheiner, I. Alkorta, D.C. Clary, R.H. Crabtree, J.J. Dannenberg, P. Hobza, *Pure Appl. Chem.* 2011, 83, 1637-1641.
- 9 Z. Yuan, G. He, S.X. Li, R.P. Misra, M.S. Strano, D. Blankschtein, *Adv. Mater.* 2022, 34, 2201472.
- 10 M. Frisch, G. Trucks, H. Schlegel, G. Scuseria, M. Robb, J. Cheeseman, G. Scalmani, V. Barone, G. Petersson, H. Nakatsuji, Wallingford, CT. 2016.
- 11 X. Li, M.J. Frisch, *J. Chem. Theory Comput.* 2006, 2, 835-839.
- 12 T. Lu, F. Chen, *J. Comput. Chem.* 2012, 33, 580-592.
